# Supplementary material for: Drug exposure misclassification in pharmacoepidemiology: Sources and relative impact
Source: PubMed Central journal article supplement (PMC9292927; doi:10.1002/pds.5346), 2021-09-07

# Content

- Table S1 - Non-differential exposure misclassification ..... 2
  - Table S1a - Observed RR 1.10 ..... 2
  - Table S1b - Observed RR 1.25 ..... 3
  - Table S1c - Observed RR 1.50 ..... 4
  - Table S1d - Observed RR 2.0 ..... 5
- Figure S1 - Differential exposure misclassification – uncaptured exposures ..... 6
  - Figure S1a – Effect of differential uncaptured exposures - risk factor present in 10% of subjects ..... 6
  - Figure S1b – Effect of differential uncaptured exposures - risk factor present in 25% of subjects ..... 7
  - Figure S1c – Effect of differential uncaptured exposures - risk factor present in 50% of subjects ..... 8
- Figure S2 - Differential exposure misclassification – non-adherence ..... 9
  - Figure S2a– Effect of differential non-adherence - risk factor present in 10% of subjects ..... 9
  - Figure S2b– Effect of differential non-adherence - risk factor present in 25% of subjects ..... 10
  - Figure S2c– Effect of differential non-adherence - risk factor present in 50% of subjects ..... 11
- Figure S3 - Comparative effectiveness research (drug A vs B) ..... 12

## Table S1 - Non-differential exposure misclassification

**Table S1a - Observed RR 1.10**

True relative risks that would lead to an observed relative risk of 1.10 in presence of different levels of uncaptured exposure or non-adherence

| Amount of misclassification |                      | True RR for different exposure prevalences |        |        |
|-----------------------------|----------------------|--------------------------------------------|--------|--------|
| Prop non-adherence          | Prop uncaptured data | p=0.01                                     | p=0.10 | p=0.25 |
| 0.0                         | 0.0                  | 1.10                                       | 1.10   | 1.10   |
| 0.0                         | 0.1                  | 1.10                                       | 1.10   | 1.10   |
| 0.0                         | 0.2                  | 1.10                                       | 1.10   | 1.11   |
| 0.0                         | 0.3                  | 1.10                                       | 1.10   | 1.11   |
| 0.0                         | 0.4                  | 1.10                                       | 1.10   | 1.11   |
| 0.0                         | 0.5                  | 1.10                                       | 1.11   | 1.12   |
| 0.1                         | 0.0                  | 1.11                                       | 1.11   | 1.11   |
| 0.1                         | 0.1                  | 1.11                                       | 1.11   | 1.12   |
| 0.1                         | 0.2                  | 1.11                                       | 1.11   | 1.12   |
| 0.1                         | 0.3                  | 1.11                                       | 1.12   | 1.13   |
| 0.1                         | 0.4                  | 1.11                                       | 1.12   | 1.13   |
| 0.1                         | 0.5                  | 1.11                                       | 1.12   | 1.13   |
| 0.2                         | 0.0                  | 1.12                                       | 1.12   | 1.12   |
| 0.2                         | 0.1                  | 1.12                                       | 1.13   | 1.13   |
| 0.2                         | 0.2                  | 1.13                                       | 1.13   | 1.14   |
| 0.2                         | 0.3                  | 1.13                                       | 1.13   | 1.14   |
| 0.2                         | 0.4                  | 1.13                                       | 1.13   | 1.15   |
| 0.2                         | 0.5                  | 1.13                                       | 1.13   | 1.16   |
| 0.3                         | 0.0                  | 1.14                                       | 1.14   | 1.14   |
| 0.3                         | 0.1                  | 1.14                                       | 1.15   | 1.15   |
| 0.3                         | 0.2                  | 1.14                                       | 1.15   | 1.16   |
| 0.3                         | 0.3                  | 1.14                                       | 1.15   | 1.17   |
| 0.3                         | 0.4                  | 1.14                                       | 1.15   | 1.18   |
| 0.3                         | 0.5                  | 1.14                                       | 1.16   | 1.19   |
| 0.4                         | 0.0                  | 1.17                                       | 1.17   | 1.17   |
| 0.4                         | 0.1                  | 1.17                                       | 1.17   | 1.18   |
| 0.4                         | 0.2                  | 1.17                                       | 1.17   | 1.19   |
| 0.4                         | 0.3                  | 1.17                                       | 1.18   | 1.21   |
| 0.4                         | 0.4                  | 1.17                                       | 1.18   | 1.22   |
| 0.4                         | 0.5                  | 1.17                                       | 1.18   | 1.23   |
| 0.5                         | 0.0                  | 1.20                                       | 1.20   | 1.20   |
| 0.5                         | 0.1                  | 1.20                                       | 1.20   | 1.22   |
| 0.5                         | 0.2                  | 1.20                                       | 1.21   | 1.24   |
| 0.5                         | 0.3                  | 1.20                                       | 1.22   | 1.27   |
| 0.5                         | 0.4                  | 1.20                                       | 1.22   | 1.29   |
| 0.5                         | 0.5                  | 1.20                                       | 1.23   | 1.31   |

**Table S1b - Observed RR 1.25**

True relative risks that would lead to an observed relative risk of 1.25 in presence of different levels of uncaptured exposure or non-adherence

| Amount of misclassification |                      | True RR for different exposure prevalences |        |        |
|-----------------------------|----------------------|--------------------------------------------|--------|--------|
| Prop non-adherence          | Prop uncaptured data | p=0.01                                     | p=0.10 | p=0.25 |
| 0.0                         | 0.0                  | 1.25                                       | 1.25   | 1.25   |
| 0.0                         | 0.1                  | 1.25                                       | 1.25   | 1.26   |
| 0.0                         | 0.2                  | 1.25                                       | 1.26   | 1.27   |
| 0.0                         | 0.3                  | 1.25                                       | 1.26   | 1.28   |
| 0.0                         | 0.4                  | 1.25                                       | 1.26   | 1.29   |
| 0.0                         | 0.5                  | 1.25                                       | 1.27   | 1.30   |
| 0.1                         | 0.0                  | 1.28                                       | 1.28   | 1.28   |
| 0.1                         | 0.1                  | 1.28                                       | 1.28   | 1.29   |
| 0.1                         | 0.2                  | 1.28                                       | 1.29   | 1.30   |
| 0.1                         | 0.3                  | 1.28                                       | 1.29   | 1.32   |
| 0.1                         | 0.4                  | 1.28                                       | 1.30   | 1.33   |
| 0.1                         | 0.5                  | 1.28                                       | 1.30   | 1.35   |
| 0.2                         | 0.0                  | 1.31                                       | 1.31   | 1.31   |
| 0.2                         | 0.1                  | 1.31                                       | 1.32   | 1.33   |
| 0.2                         | 0.2                  | 1.31                                       | 1.32   | 1.35   |
| 0.2                         | 0.3                  | 1.31                                       | 1.33   | 1.37   |
| 0.2                         | 0.4                  | 1.31                                       | 1.33   | 1.39   |
| 0.2                         | 0.5                  | 1.31                                       | 1.34   | 1.41   |
| 0.3                         | 0.0                  | 1.36                                       | 1.36   | 1.36   |
| 0.3                         | 0.1                  | 1.36                                       | 1.36   | 1.38   |
| 0.3                         | 0.2                  | 1.36                                       | 1.37   | 1.41   |
| 0.3                         | 0.3                  | 1.36                                       | 1.38   | 1.43   |
| 0.3                         | 0.4                  | 1.36                                       | 1.39   | 1.46   |
| 0.3                         | 0.5                  | 1.36                                       | 1.39   | 1.49   |
| 0.4                         | 0.0                  | 1.42                                       | 1.42   | 1.42   |
| 0.4                         | 0.1                  | 1.42                                       | 1.43   | 1.45   |
| 0.4                         | 0.2                  | 1.42                                       | 1.44   | 1.49   |
| 0.4                         | 0.3                  | 1.42                                       | 1.45   | 1.53   |
| 0.4                         | 0.4                  | 1.42                                       | 1.46   | 1.58   |
| 0.4                         | 0.5                  | 1.42                                       | 1.47   | 1.62   |
| 0.5                         | 0.0                  | 1.50                                       | 1.50   | 1.50   |
| 0.5                         | 0.1                  | 1.50                                       | 1.51   | 1.56   |
| 0.5                         | 0.2                  | 1.50                                       | 1.53   | 1.63   |
| 0.5                         | 0.3                  | 1.50                                       | 1.55   | 1.70   |
| 0.5                         | 0.4                  | 1.50                                       | 1.56   | 1.78   |
| 0.5                         | 0.5                  | 1.51                                       | 1.58   | 1.85   |

**Table S1c - Observed RR 1.50**

True relative risks that would lead to an observed relative risk of 1.50 in presence of different levels of uncaptured exposure or non-adherence

| Amount of misclassification |                      | True RR for different exposure prevalences |        |        |
|-----------------------------|----------------------|--------------------------------------------|--------|--------|
| Prop non-adherence          | Prop uncaptured data | p=0.01                                     | p=0.10 | p=0.25 |
| 0.0                         | 0.0                  | 1.50                                       | 1.50   | 1.50   |
| 0.0                         | 0.1                  | 1.50                                       | 1.51   | 1.53   |
| 0.0                         | 0.2                  | 1.50                                       | 1.52   | 1.55   |
| 0.0                         | 0.3                  | 1.50                                       | 1.53   | 1.58   |
| 0.0                         | 0.4                  | 1.50                                       | 1.53   | 1.61   |
| 0.0                         | 0.5                  | 1.50                                       | 1.54   | 1.64   |
| 0.1                         | 0.0                  | 1.56                                       | 1.56   | 1.56   |
| 0.1                         | 0.1                  | 1.56                                       | 1.57   | 1.59   |
| 0.1                         | 0.2                  | 1.56                                       | 1.58   | 1.62   |
| 0.1                         | 0.3                  | 1.56                                       | 1.59   | 1.66   |
| 0.1                         | 0.4                  | 1.56                                       | 1.60   | 1.69   |
| 0.1                         | 0.5                  | 1.56                                       | 1.61   | 1.73   |
| 0.2                         | 0.0                  | 1.62                                       | 1.62   | 1.62   |
| 0.2                         | 0.1                  | 1.63                                       | 1.64   | 1.67   |
| 0.2                         | 0.2                  | 1.63                                       | 1.65   | 1.71   |
| 0.2                         | 0.3                  | 1.63                                       | 1.67   | 1.76   |
| 0.2                         | 0.4                  | 1.63                                       | 1.68   | 1.81   |
| 0.2                         | 0.5                  | 1.63                                       | 1.69   | 1.86   |
| 0.3                         | 0.0                  | 1.71                                       | 1.71   | 1.71   |
| 0.3                         | 0.1                  | 1.72                                       | 1.73   | 1.77   |
| 0.3                         | 0.2                  | 1.72                                       | 1.75   | 1.84   |
| 0.3                         | 0.3                  | 1.72                                       | 1.77   | 1.91   |
| 0.3                         | 0.4                  | 1.72                                       | 1.79   | 1.98   |
| 0.3                         | 0.5                  | 1.72                                       | 1.81   | 2.06   |
| 0.4                         | 0.0                  | 1.83                                       | 1.83   | 1.83   |
| 0.4                         | 0.1                  | 1.83                                       | 1.86   | 1.93   |
| 0.4                         | 0.2                  | 1.84                                       | 1.88   | 2.02   |
| 0.4                         | 0.3                  | 1.84                                       | 1.91   | 2.13   |
| 0.4                         | 0.4                  | 1.84                                       | 1.94   | 2.25   |
| 0.4                         | 0.5                  | 1.84                                       | 1.96   | 2.37   |
| 0.5                         | 0.0                  | 2.00                                       | 2.00   | 2.00   |
| 0.5                         | 0.1                  | 2.00                                       | 2.04   | 2.16   |
| 0.5                         | 0.2                  | 2.01                                       | 2.08   | 2.33   |
| 0.5                         | 0.3                  | 2.01                                       | 2.12   | 2.53   |
| 0.5                         | 0.4                  | 2.01                                       | 2.16   | 2.75   |
| 0.5                         | 0.5                  | 2.01                                       | 2.20   | 3.00   |

**Table S1d - Observed RR 2.0**

True relative risks that would lead to an observed relative risk of 2.0 in presence of different levels of uncaptured exposure or non-adherence

| Amount of misclassification |                      | True RR for different exposure prevalences |        |        |
|-----------------------------|----------------------|--------------------------------------------|--------|--------|
| Prop non-adherence          | Prop uncaptured data | p=0.01                                     | p=0.10 | p=0.25 |
| 0.0                         | 0.0                  | 2.00                                       | 2.00   | 2.00   |
| 0.0                         | 0.1                  | 2.00                                       | 2.02   | 2.07   |
| 0.0                         | 0.2                  | 2.00                                       | 2.05   | 2.14   |
| 0.0                         | 0.3                  | 2.01                                       | 2.07   | 2.22   |
| 0.0                         | 0.4                  | 2.01                                       | 2.09   | 2.31   |
| 0.0                         | 0.5                  | 2.01                                       | 2.12   | 2.40   |
| 0.1                         | 0.0                  | 2.11                                       | 2.11   | 2.11   |
| 0.1                         | 0.1                  | 2.11                                       | 2.14   | 2.20   |
| 0.1                         | 0.2                  | 2.12                                       | 2.17   | 2.30   |
| 0.1                         | 0.3                  | 2.12                                       | 2.20   | 2.40   |
| 0.1                         | 0.4                  | 2.12                                       | 2.23   | 2.51   |
| 0.1                         | 0.5                  | 2.12                                       | 2.26   | 2.64   |
| 0.2                         | 0.0                  | 2.25                                       | 2.25   | 2.25   |
| 0.2                         | 0.1                  | 2.25                                       | 2.29   | 2.37   |
| 0.2                         | 0.2                  | 2.26                                       | 2.32   | 2.50   |
| 0.2                         | 0.3                  | 2.26                                       | 2.36   | 2.64   |
| 0.2                         | 0.4                  | 2.26                                       | 2.40   | 2.80   |
| 0.2                         | 0.5                  | 2.27                                       | 2.44   | 2.98   |
| 0.3                         | 0.0                  | 2.43                                       | 2.43   | 2.43   |
| 0.3                         | 0.1                  | 2.43                                       | 2.48   | 2.60   |
| 0.3                         | 0.2                  | 2.44                                       | 2.53   | 2.78   |
| 0.3                         | 0.3                  | 2.44                                       | 2.58   | 3.00   |
| 0.3                         | 0.4                  | 2.44                                       | 2.63   | 3.24   |
| 0.3                         | 0.5                  | 2.45                                       | 2.69   | 3.52   |
| 0.4                         | 0.0                  | 2.67                                       | 2.67   | 2.67   |
| 0.4                         | 0.1                  | 2.67                                       | 2.73   | 2.92   |
| 0.4                         | 0.2                  | 2.68                                       | 2.80   | 3.22   |
| 0.4                         | 0.3                  | 2.68                                       | 2.88   | 3.57   |
| 0.4                         | 0.4                  | 2.69                                       | 2.96   | 4.00   |
| 0.4                         | 0.5                  | 2.69                                       | 3.04   | 4.51   |
| 0.5                         | 0.0                  | 3.00                                       | 3.00   | 3.00   |
| 0.5                         | 0.1                  | 3.01                                       | 3.10   | 3.44   |
| 0.5                         | 0.2                  | 3.02                                       | 3.21   | 4.00   |
| 0.5                         | 0.3                  | 3.02                                       | 3.32   | 4.71   |
| 0.5                         | 0.4                  | 3.03                                       | 3.44   | 5.66   |
| 0.5                         | 0.5                  | 3.04                                       | 3.57   | 6.99   |

## Figure S1 - Differential exposure misclassification – uncaptured exposures

Figure S1a – Effect of differential uncaptured exposures - risk factor present in 10% of subjects

Observed relative risks obtained with different proportion of exposure captured for subjects with and without risk factor, in absence of a true effect ( $RR_{true} = 1.0$ ).

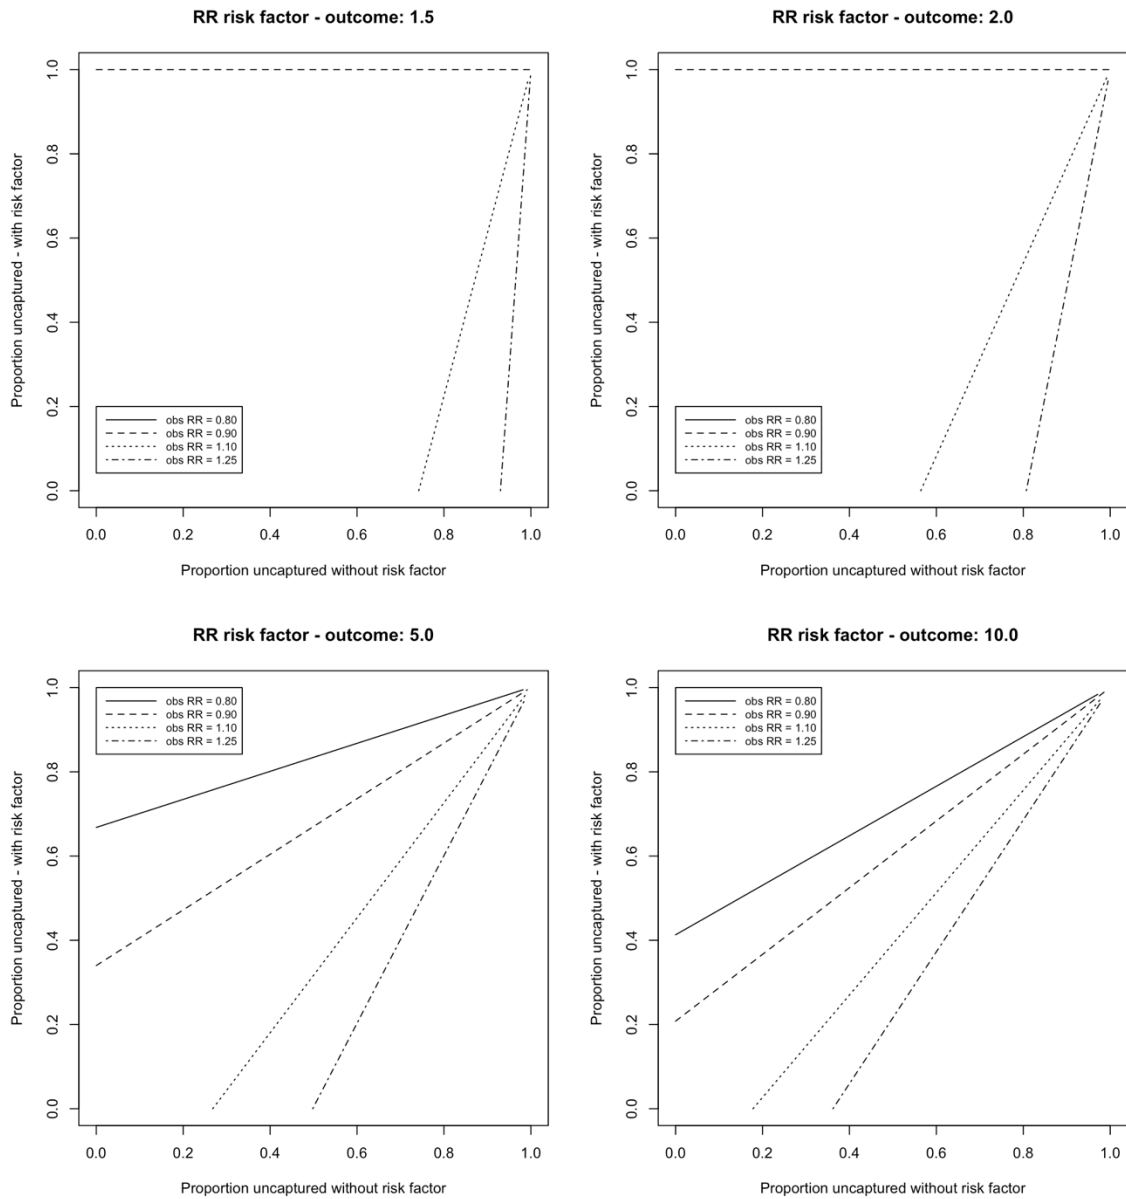

Figure S1b – Effect of differential uncaptured exposures - risk factor present in 25% of subjects  
Observed relative risks obtained with different proportion of exposure captured for subjects with and without risk factor, in absence of a true effect ( $RR_{true} = 1.0$ ).

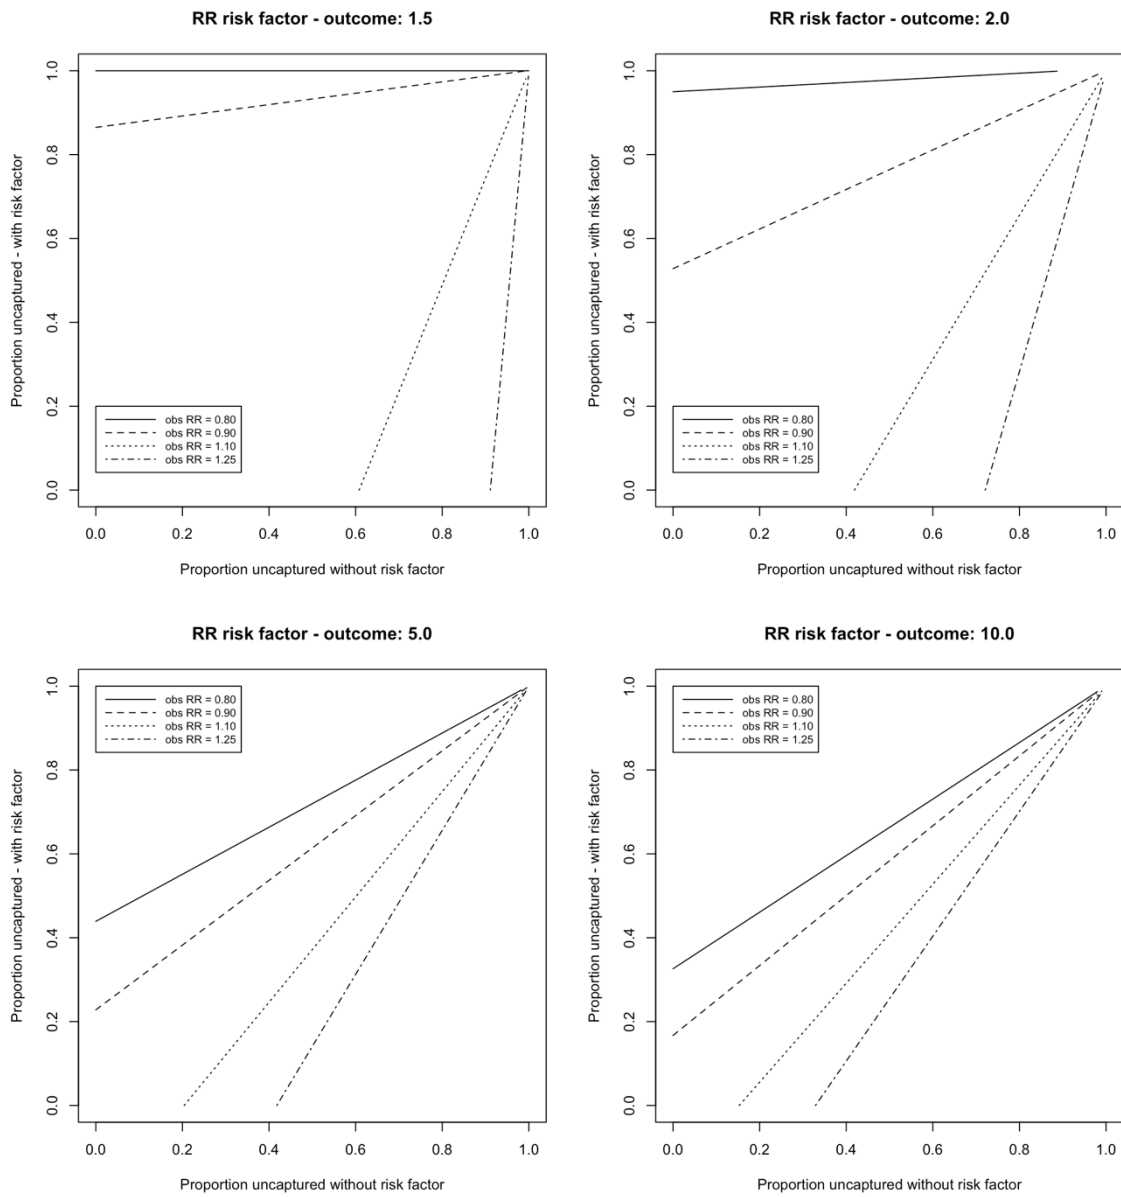

**Figure S1c – Effect of differential uncaptured exposures - risk factor present in 50% of subjects**  
 Observed relative risks obtained with different proportion of exposure captured for subjects with and without risk factor, in absence of a true effect ( $RR_{true} = 1.0$ ).

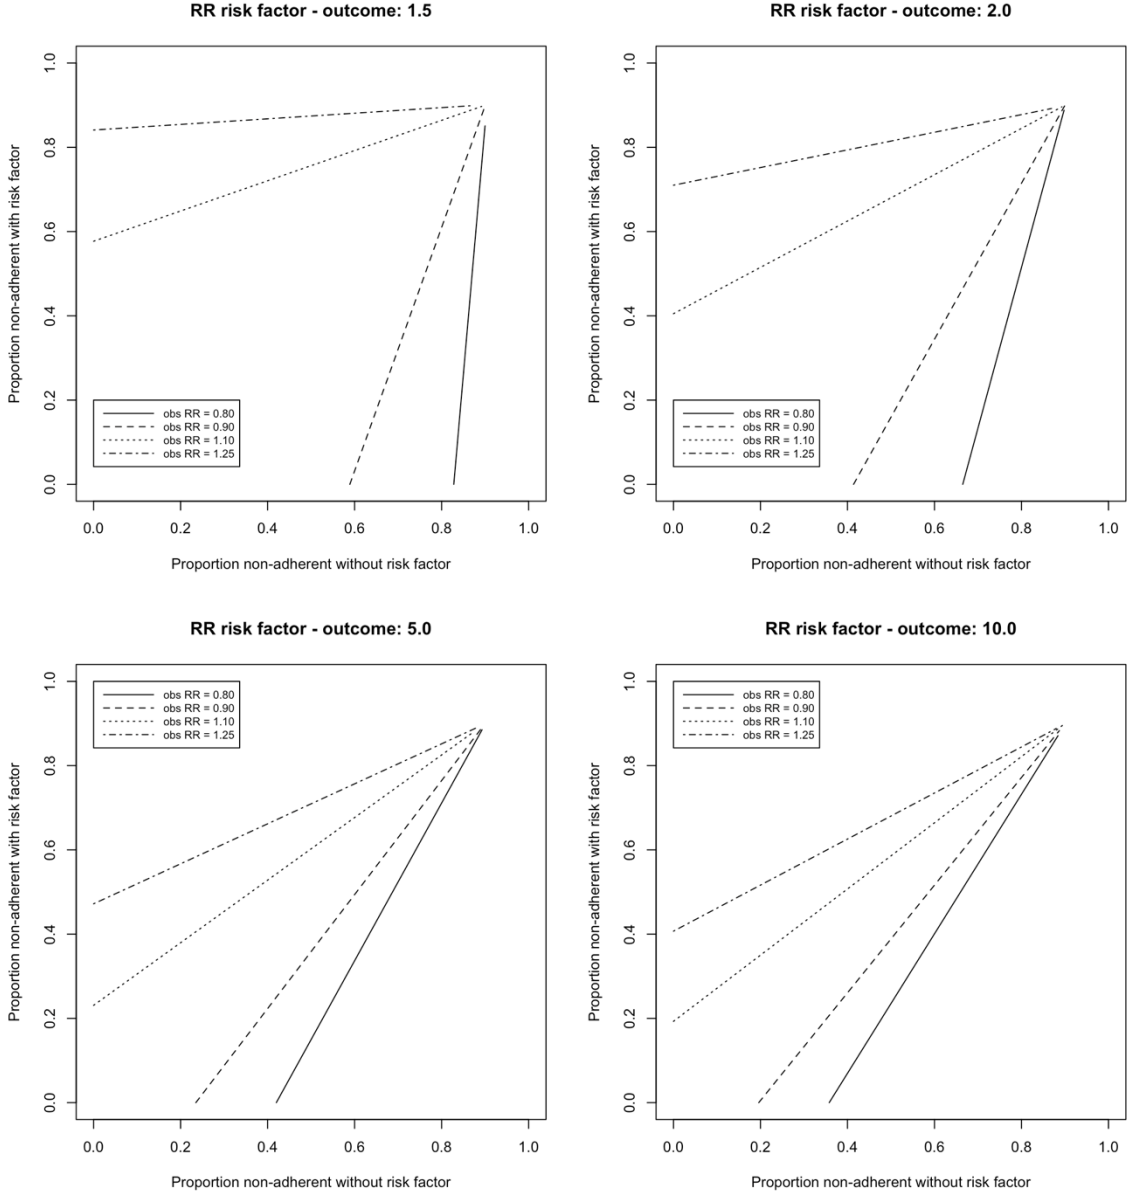



Figure S2 - Differential exposure misclassification – non-adherence

Figure S2a– Effect of differential non-adherence - risk factor present in 10% of subjects  
Observed relative risks obtained with different proportion of exposure captured for subjects with and without risk factor, in absence of a true effect ( $RR_{true} = 1.0$ ).

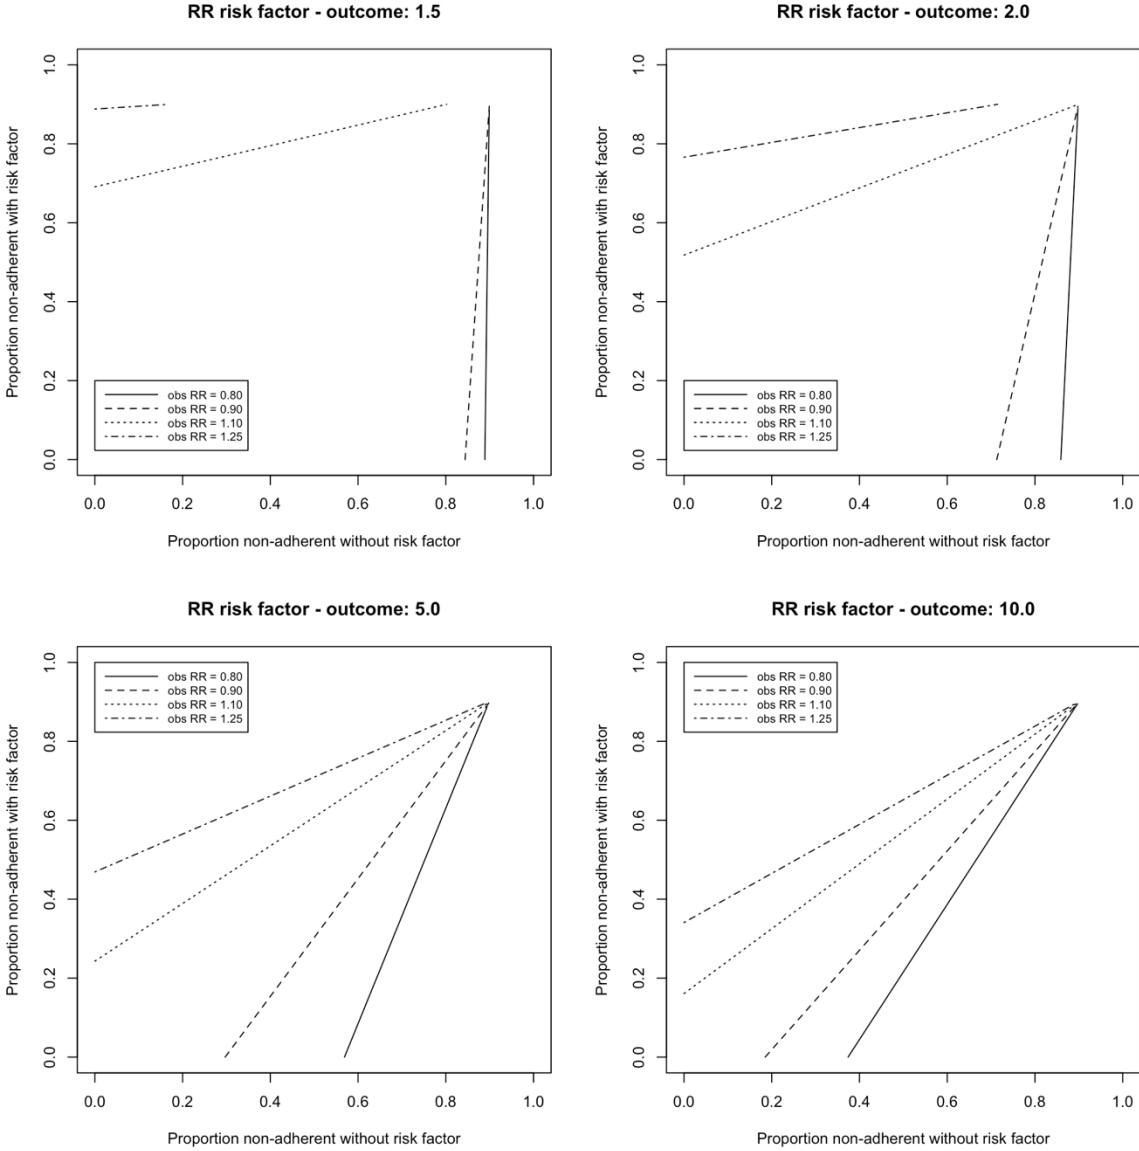

Figure S2b— Effect of differential non-adherence - risk factor present in 25% of subjects

Observed relative risks obtained with different proportion of exposure captured for subjects with and without risk factor, in absence of a true effect ( $RR_{true} = 1.0$ ).

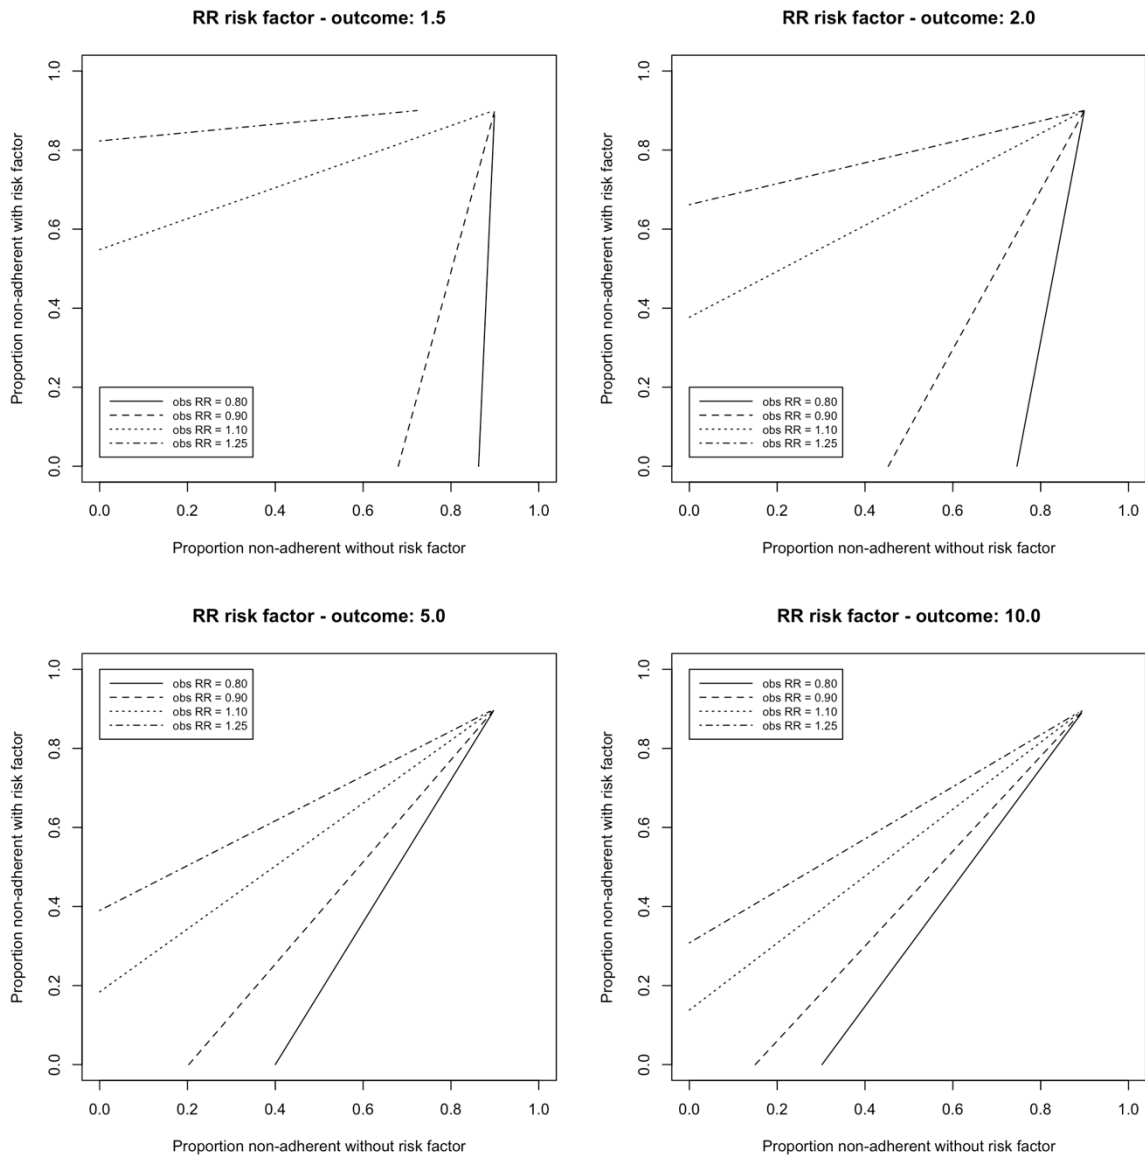

**Figure S2c– Effect of differential non-adherence - risk factor present in 50% of subjects**  
 Observed relative risks obtained with different proportion of exposure captured for subjects with and without risk factor, in absence of a true effect ( $RR_{true} = 1.0$ ).

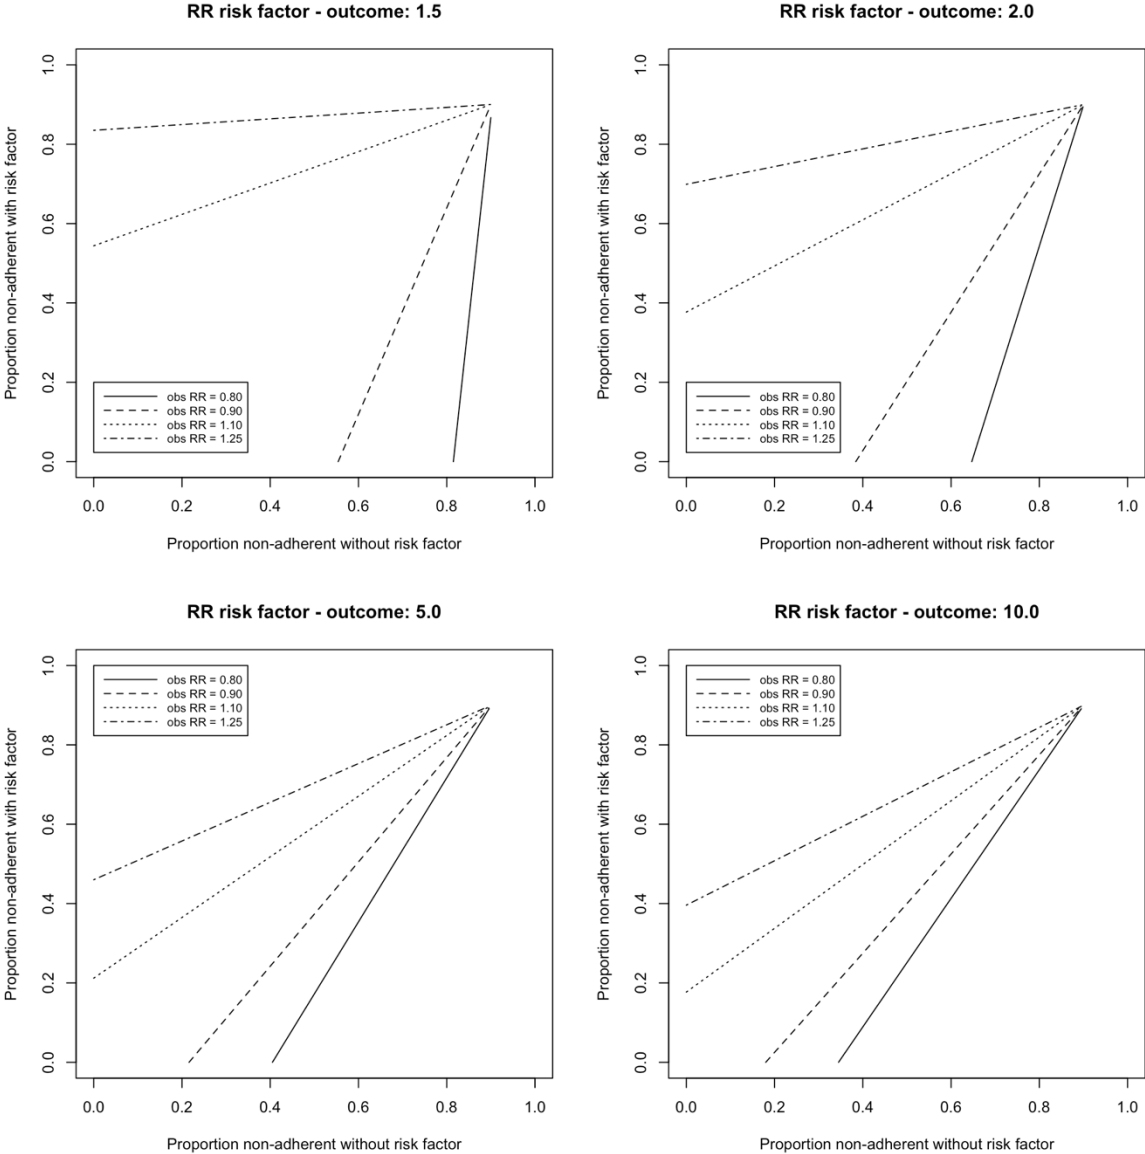

Figure S3 - Comparative effectiveness research (drug A vs B)

Comparative effectiveness research setting. True effect A vs B: RR=1.0

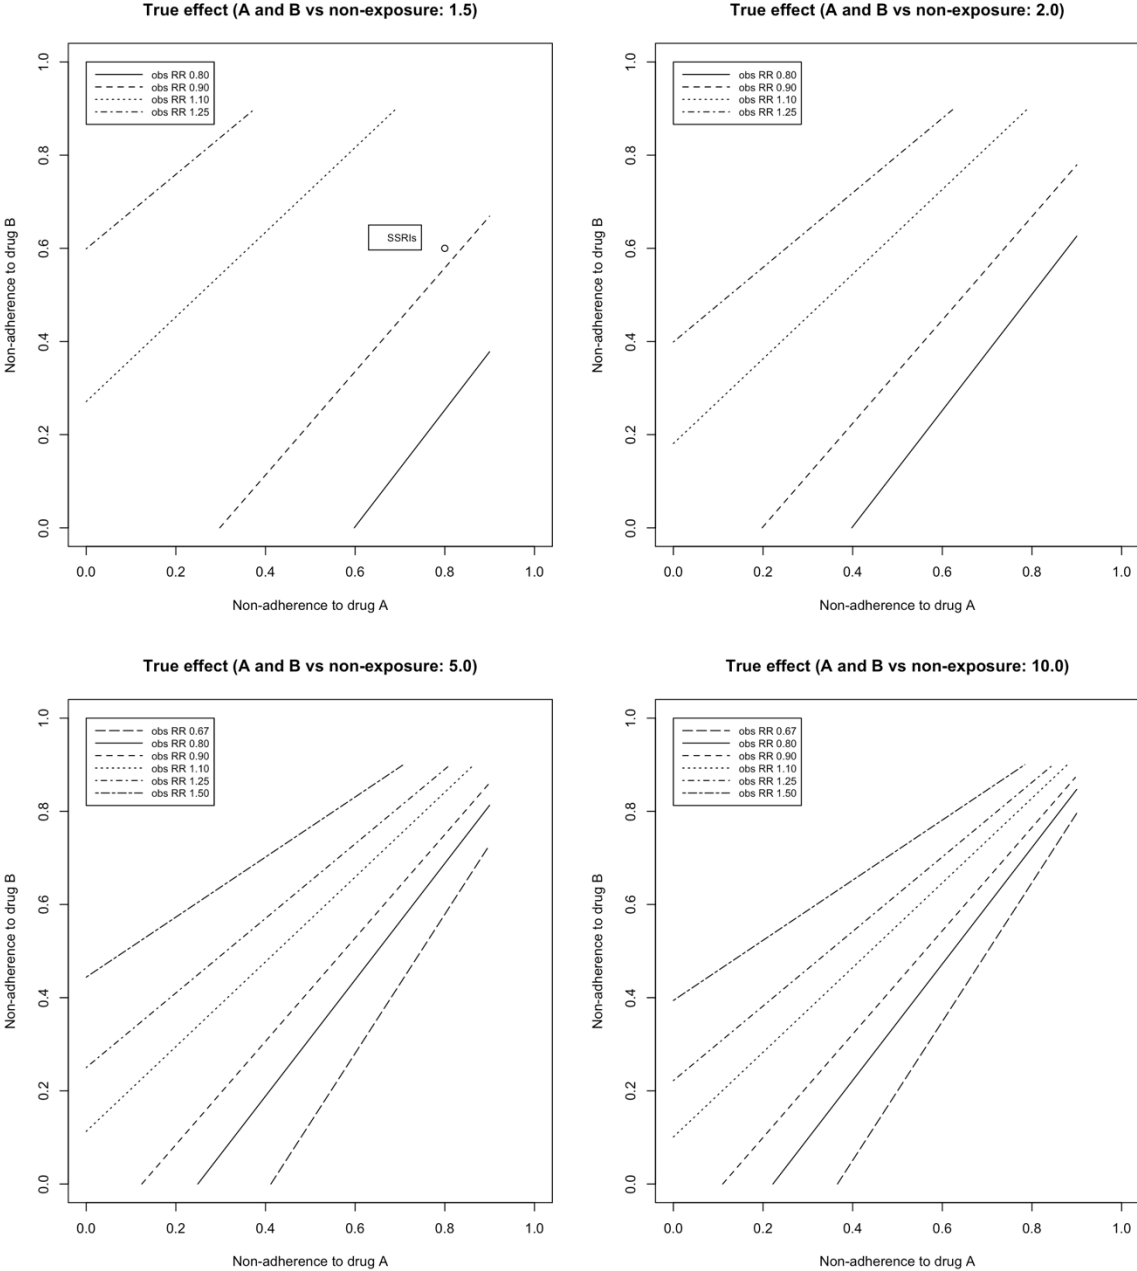

Supplement: PDS-30-1703-s001.pdf [file PDS-30-1703-s001.pdf]
